# Supplementary material for: An electrochemical biosensor for Staphylococcus aureus detection based on a multilevel surface 3D micro/nanostructure
Source: Royal Society of Chemistry journal article supplement (doi:10.1039/d4an00197d), 2024-01-01
Supplement: d4an00197d1.pdf [file d4an00197d1.pdf]

## Supporting Information

### Electrochemical biosensor for *Staphylococcus aureus* detection based on a multilevel surface 3D microstructure

Caiyun Wang,<sup>†b</sup> Rui Yang,<sup>†b</sup> Guangtong Wang,<sup>a\*</sup> and Shaoqin Liu<sup>a\*</sup>

<sup>a</sup> School of Medicine and Health, Harbin Institute of Technology, Harbin 150080, P. R. China.

<sup>b</sup> School of Life Science and Technology, Harbin Institute of Technology, Harbin 150080, P. R. China

<sup>†</sup> These two authors contribute equally.

E-mail: [wgt@hit.edu.cn](mailto:wgt@hit.edu.cn), [shaoqinliu@hit.edu.cn](mailto:shaoqinliu@hit.edu.cn)

#### 1. The relationship between the density of Au clusters distributed on the electrode and the time for electrodeposition

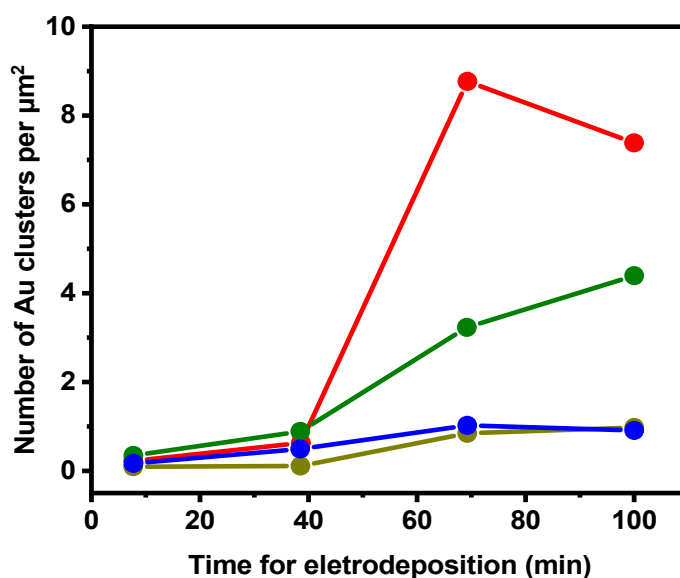

**Figure S1** The relationship between the density of Au clusters distributed on the electrode and the time for electrodeposition calculated by their SEM images. Size of the protrusion: 6 μm × 6 μm square (red), 8 μm × 8 μm square (green), 10 μm × 10 μm square (blue), and 16 μm × 16 μm square (brown).

## 2. Height measurement of the 3D protrusions by AFM

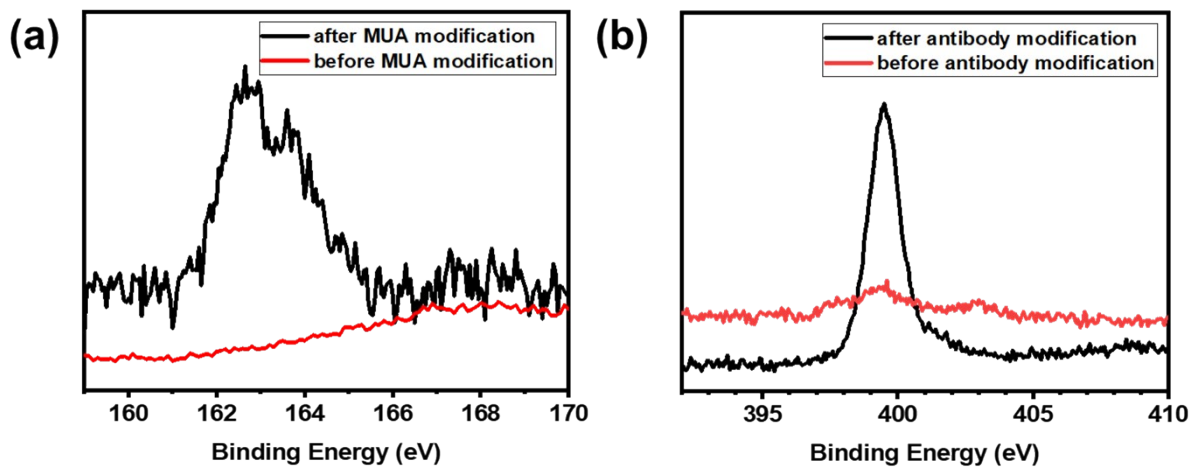

**Figure S2** (a) The XPS spectra of S before or after MUA modification. (b) The XPS spectra of N before or after *S. aureus* antibody modification.

3. The EIS spectra of the electrodes that captured *S. aureus* for different lengths of time.

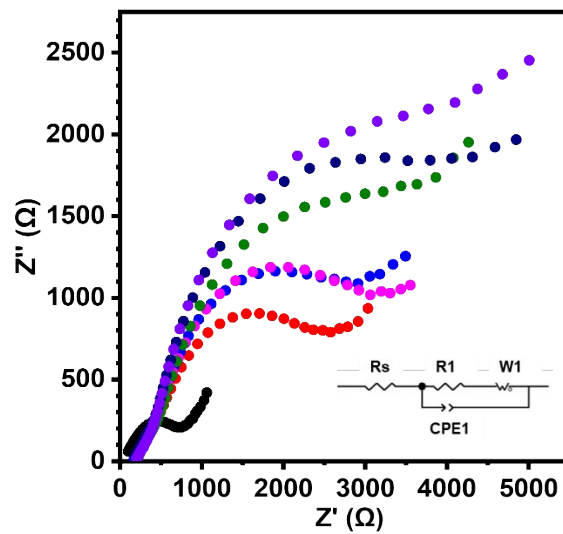

**Figure S3.** The EIS spectra of the electrodes captured *S. aureus* for different lengths of time. Black plot: 0 min, red plot: 20 min, blue plot: 25 min, magenta: 30 min, green: 35 min, navy: 40 min, purple: 60 min.

4. The EIS spectra of the electrodes which are modified by *S. aureus* antibody solutions with different concentrations.

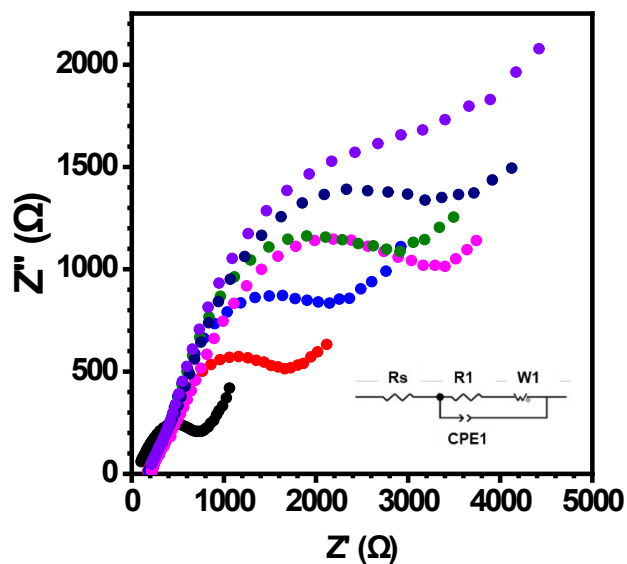

**Figure S4** The EIS spectra of the electrodes which are modified by *S. aureus* antibody solutions with different concentrations. Black plot: 0  $\mu\text{g/mL}$ , red plot: 15  $\mu\text{g/mL}$ , blue plot: 20  $\mu\text{g/mL}$ , magenta: 25  $\mu\text{g/mL}$ , green: 30  $\mu\text{g/mL}$ , navy: 35  $\mu\text{g/mL}$ , purple: 40  $\mu\text{g/mL}$ .

## 5. The Change of EIS spectra after absorbing *Salmonella*, and *E. coli*.

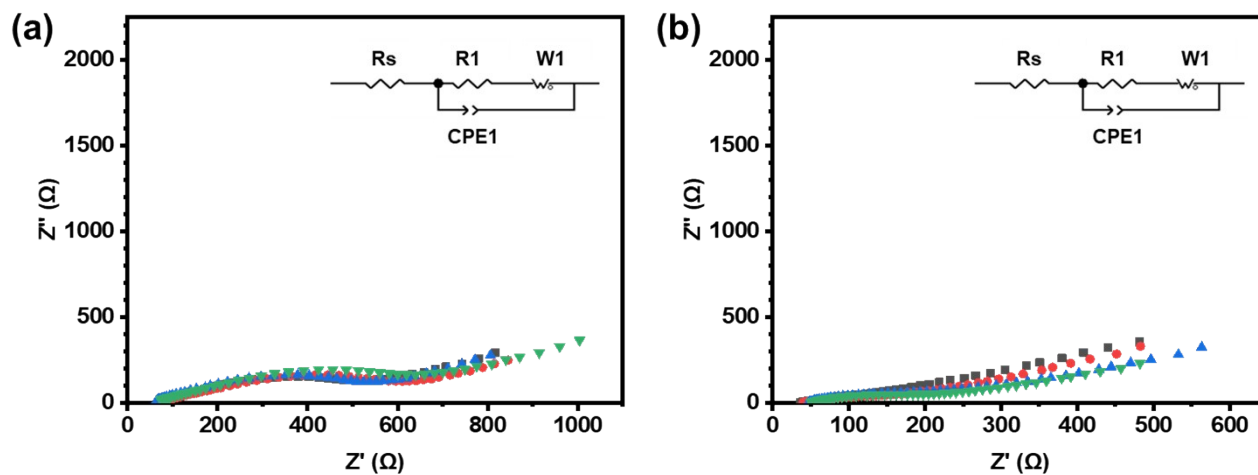

**Figure S5.** (a) The EIS spectra of the electrodes captured *Salmonella* for different lengths of time. Black plot: 0 min, red plot: 30 min, blue plot: 40 min, green: 60 min. (b) The EIS spectra of the electrodes captured *E. coli* for different lengths of time. Black plot: 0 min, red plot: 30 min, blue plot: 40 min, green: 60 min.

6. EIS spectra of the electrodes that are applied for detecting *S. aureus* in milk and simulated human tissue fluid

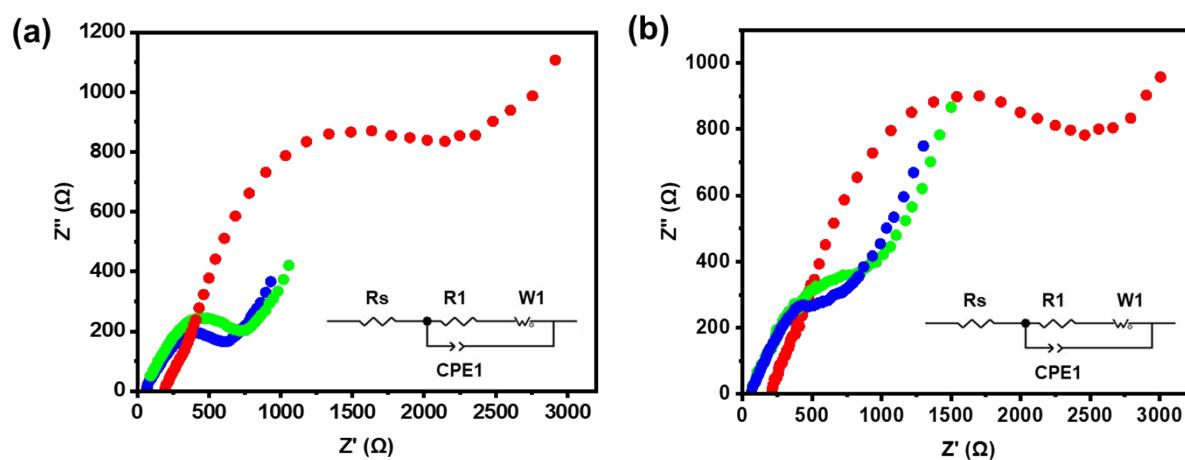

**Figure S6.** (a) The EIS spectra of the electrodes that adsorbed *S. aureus* from milk containing 0 CFU/mL, 10 CFU/mL, and 100 CFU/mL *S. aureus*. (b) The EIS spectra of the electrodes that adsorbed *S. aureus* from simulated human tissue fluid containing 0 CFU/mL, 10 CFU/mL, and 100 CFU/mL *S. aureus*.
